# Supplementary material for: Discovery of pancreastatin inhibitor PSTi8 for the treatment of insulin resistance and diabetes: studies in rodent models of diabetes mellitus
Source: PubMed Central journal article supplement (PMC5992141; doi:10.1038/s41598-018-27018-8), 2018-06-07

**Discovery of pancreastatin inhibitor PSTi8 for the treatment of insulin resistance and diabetes: studies in rodent models of diabetes mellitus**

Zakir Hossain<sup>1#</sup>, Guru R. Valicherla<sup>1,3#</sup>, Anand P. Gupta<sup>1#</sup>, Anees A. Syed<sup>1</sup>, Mohammed Riyazuddin<sup>1</sup>, Sharat Chandra<sup>2</sup>, Mohammad I. Siddiqi<sup>2</sup>, Jiaur R. Gayen<sup>1,3\*</sup>

**Supplementary Table 1:** Peptide secondary structure analysis by circular dichroism using the K2D3 software

| Peptide Name | Molecular Weight (kDa) | Alpha helix (%) | Beta sheet (%) | Anti-PST activity |
|--------------|------------------------|-----------------|----------------|-------------------|
| S1/PST       | 3.28                   | 8.82            | 16.54          |                   |
| S2/PSTi8     | 2.427                  | 9.07            | 16.52          | +++               |
| S3/PSTi7     | 2.624                  | 12.06           | 15.41          | +                 |
| S4/PSTi2     | 2.685                  | 2.07            | 17.62          | -                 |

**Supplementary Table 2.** List of PST inhibitor peptides sequence

| Name     | Peptide Sequence                                           |
|----------|------------------------------------------------------------|
| PSTi1    | GKGEQEHSQQKEEEEEMAVVPQGLFRG, 27 aa, Amidation (C-Terminal) |
| PSTi2    | GEQEHSQQKEEEEEMAVVPQGLFRG, 25 aa, Amidation (C-Terminal)   |
| PSTi3    | QEHSQQKEEEEEMAVVPQGLFRG, 23 aa, Amidation (C-Terminal)     |
| PSTi4    | HSQQKEEEEEMAVVPQGLFRG, 21 aa, Amidation (C-Terminal)       |
| PSTi5    | PEGKGEQEHSQQKEEEEEMAVVPQGLF, 27 aa, Amidation (C-Terminal) |
| PSTi6    | PEGKGEQEHSQQKEEEEEMAVVPQG, 25 aa, Amidation (C-Terminal)   |
| PSTi7    | PEGKGEQEHSQQKEEEEEMAVVP, 23 aa, Amidation (C-Terminal)     |
| PSTi8    | PEGKGEQEHSQQKEEEEEMAV, 21 aa, Amidation (C-Terminal)       |
| RI-PSTi7 | pvvameeeekqqsheqeGkGep, 23 aa, Amidation (C-Terminal)      |
| RI-PSTi8 | vameeeekqqsheqeGkGep, 21 aa, Amidation (C-Terminal)        |

**Supplementary Table 3.** Primer sequence of related genes used for RT qPCR

| Gene name                    | Forward primers         | Reverse primers         |
|------------------------------|-------------------------|-------------------------|
| <i>hPfk1</i>                 | GAAGTCAAACCTGAATGTGTC   | CCTCTTGTAGGCAGTAAGTC    |
| <i>hHk</i>                   | CACCTGTGAGGTTGGACTCA    | CCACCATCTCCACGTTCTTC    |
| <i>hPepck</i>                | AGATGGAGGAAGAGGGCATC    | GTGAGAGCCAACCAGCAGTT    |
| <i>hG6pase</i>               | ACTGGTTCAACCTCGTCTT     | CGAAAGATAGCGAGAGTAGA    |
| <i>hPpara</i>                | CCGCAATGGACCATGTAAC     | CAGCTCTAGCATGGCCTTTT    |
| <i>hCpt1a</i>                | CACCTCCGTAGCTGACTCG     | CGTGAAC TGAAAGGCCACA    |
| <i>hSrebp1c</i>              | GTGGGCACTGAGGCAAAG      | GACAGCAGTGCGCAGACTTA    |
| <i>hScd1</i>                 | CCTAGAAGCTGAGAACTGGTGA  | ACATCATCAGCAAGCCAGGT    |
| <i>hGapdh</i>                | AGCCACATCGCTCAGACAC     | AATACGACCAAATCCGTTGACT  |
| <i>hβactin</i>               | CTACGTCGCCCTGGACTTCGAGC | GATGGAGCCGCCGATCCACACGG |
| <i>mUcp2</i>                 | GTTCTCTGTCTCGTCTTGC     | GGCCTTGAAACCAACCA       |
| <i>mPgc1a</i>                | AGCCGTGACCACTGACAACGAG  | CTGCATGGTTCTGAGTGCTAAG  |
| <i>mFoxo1</i>                | CTTCAAGGATAAGGGCGACA    | GACAGATTGTGGCGAATTGA    |
| <i>mAkt1</i>                 | TCGTGTGGCAGGATGTGTAT    | ACCTGGTGTTCAGTCTCAGAGG  |
| <i>mPparβ</i>                | TCCAGAAGAAGAACCGCAACA   | GGATAGCGTTGTGCGACATG    |
| <i>mPepck</i>                | ATGTGTGGGCGATGACATT     | AACCCGTTTTCTGGGTTGAT    |
| <i>mG6pase</i>               | CATGGGCGCAGCAGGTGTATACT | CAAGGTAGATCCGGGACAGACAG |
| <i>mPfk1</i>                 | GGAAGCCAAATGGGACTGT     | CGCACTACCGATGATGGTC     |
| <i>mPk</i>                   | GTGGAGGCTTCCTTCAAGTG    | AGGTCCGGTAGCGAGACAGAA   |
| <i>mPparγ</i>                | CAGGCCGAGAAGGAGAAGCT    | GGCTCGCAGATCAGCAGACT    |
| <i>mSrebp1c</i>              | GGTTTTGAACGACATCGAAGA   | CGGGAAGTCACTGTCTTGGT    |
| <i>mFas</i>                  | CGGAAACTTCAGGAAATGTCC   | TCAGAGACGTGTCACTCCTGG   |
| <i>mGapdh</i>                | GTGTCCGTCGTGGATCTGA     | CCTGCTTACCACCTTCTTG     |
| <i>mβactin</i>               | CCTCACCTCCCAAAGC        | GTGGACTCAGGGCATGGA      |
| <i>hPyruvate carboxylase</i> | GACTGTTTCGGAACCTTCAGCAT | GAGGCAGCAGCGGTAGAG      |

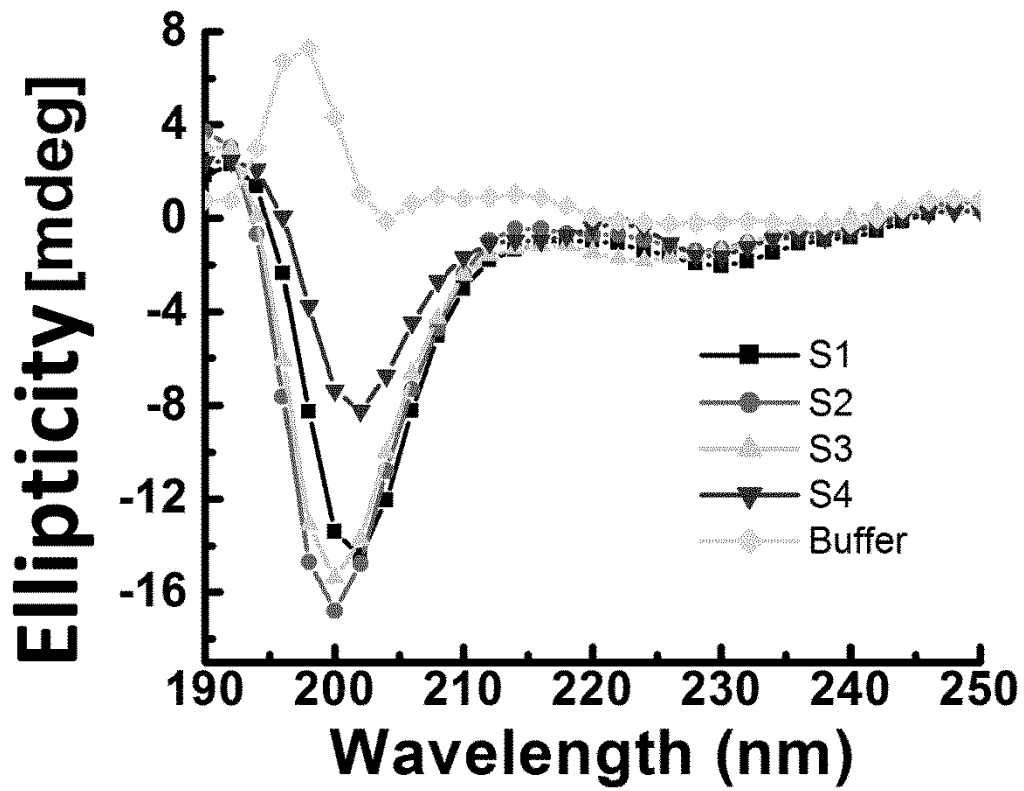

**Supplementary Figure 1.** Determination of secondary structures of PST and PST inhibitors in aqueous environment using circular dichroism (CD). S1: PST, S2: PSTi8, S3: PSTi7, S4: PSTi2.

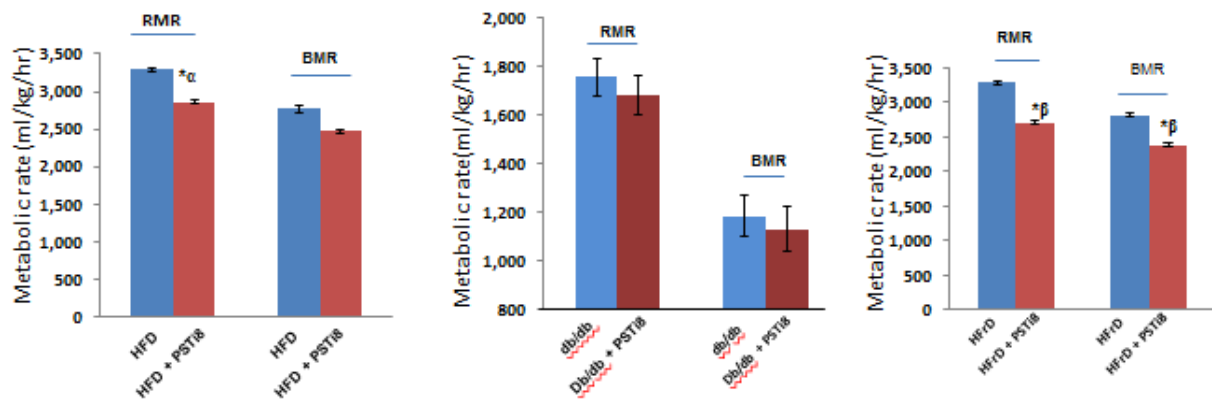

**Supplementary Figure 2** Measurement of Basal metabolic rate (BMR) and resting metabolic rate (RMR) in HFD, HFrD-fed and db/db and its PSTi8 treated mice.  $\alpha$ , HFD vs HFD +PSTi8;  $\beta$ , HFrD vs HFrD + PSTi8. \*,  $p < 0.05$ , error bar  $\pm$  s.e.m of mean.

Supplementary information for figure 5 a, d, g and j (unedited full blots)

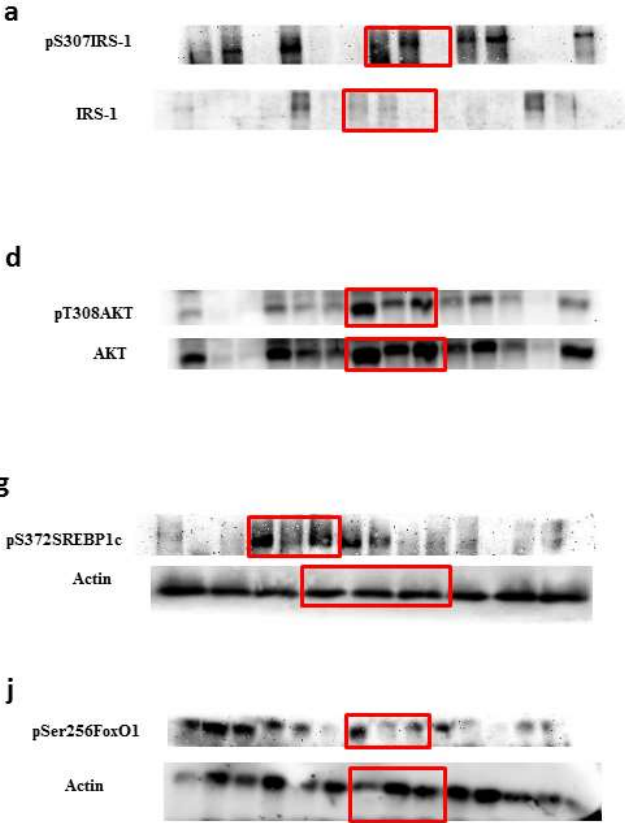

Supplementary information for figure 5 b, e, k and o (unedited full blots)

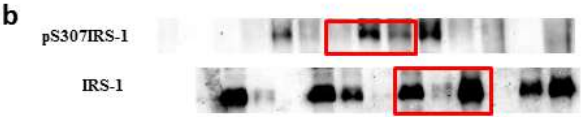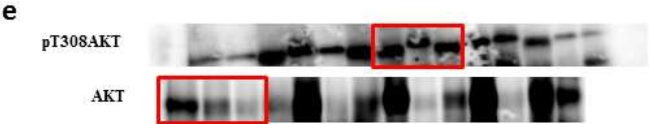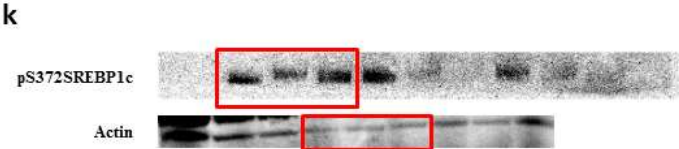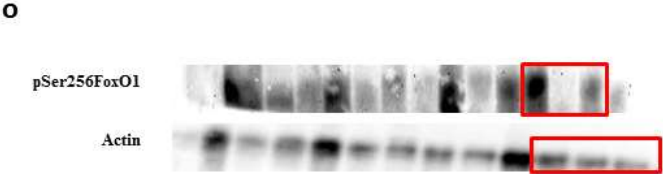



Supplementary information for figure 5 c, f, i and l (unedited full blots)

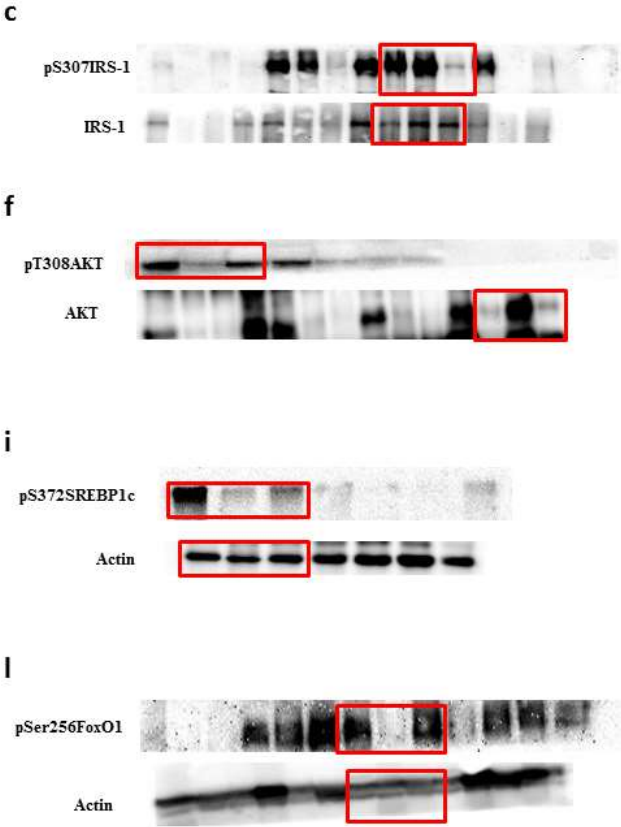

Supplement: 41598_2018_27018_MOESM1_ESM.pdf [file 41598_2018_27018_MOESM1_ESM.pdf]
